# Supplementary material
Source: PubMed Central journal article supplement (PMC1941808)
Supplement: pnas_0702410104_1.pdf [file pnas_0702410104_1.pdf]

## DNA ends after I-SceI digestion

AAGCTTTAGGGATAA 3'  
TTCGAAATCCC 5'

5' CCCTAAAGCTT  
3' AATAGGGATTTCGAA

### Control

AAGCTTTAGGGA ⊕ -3  
TTCGAAATCCC ⊕ +1

+3 TATCCCTAAAGCTT  
-1 ⊕ AATAGGGATTTCGAA

CAACA ⊕ -29  
GTTGT ⊕ -26



+4 TTATCCCTAAAGCTT  
0 AATAGGGATTTCGAA

AAGCTTTAGGG ⊕ -4  
TTCGAAATCCC 0

**163 pb**

+1 TCCCTAAAGCTT  
-3 ⊕ AAGGGATTTCGAA

### TRF2

AAGCTTTAGGGA ⊕ -3  
TTCGAAATCCC ⊕ +1

+4 TTATCCCTAAAGCTT  
0 AATAGGGATTTCGAA

AAGCTTTAGGGA ⊕ -3  
TTCGAAATCCC ⊕ +1

**525 pb**

+3 TATCCCTAAAGCTT  
-1 ⊕ AATAGGGATTTCGAA
